# Supplementary material
Source: PubMed Central journal article supplement (PMC7898419)
Supplement: NIHMS1671057-supplement-Supplemental_Materials.pdf [file NIHMS1671057-supplement-Supplemental_Materials.pdf]

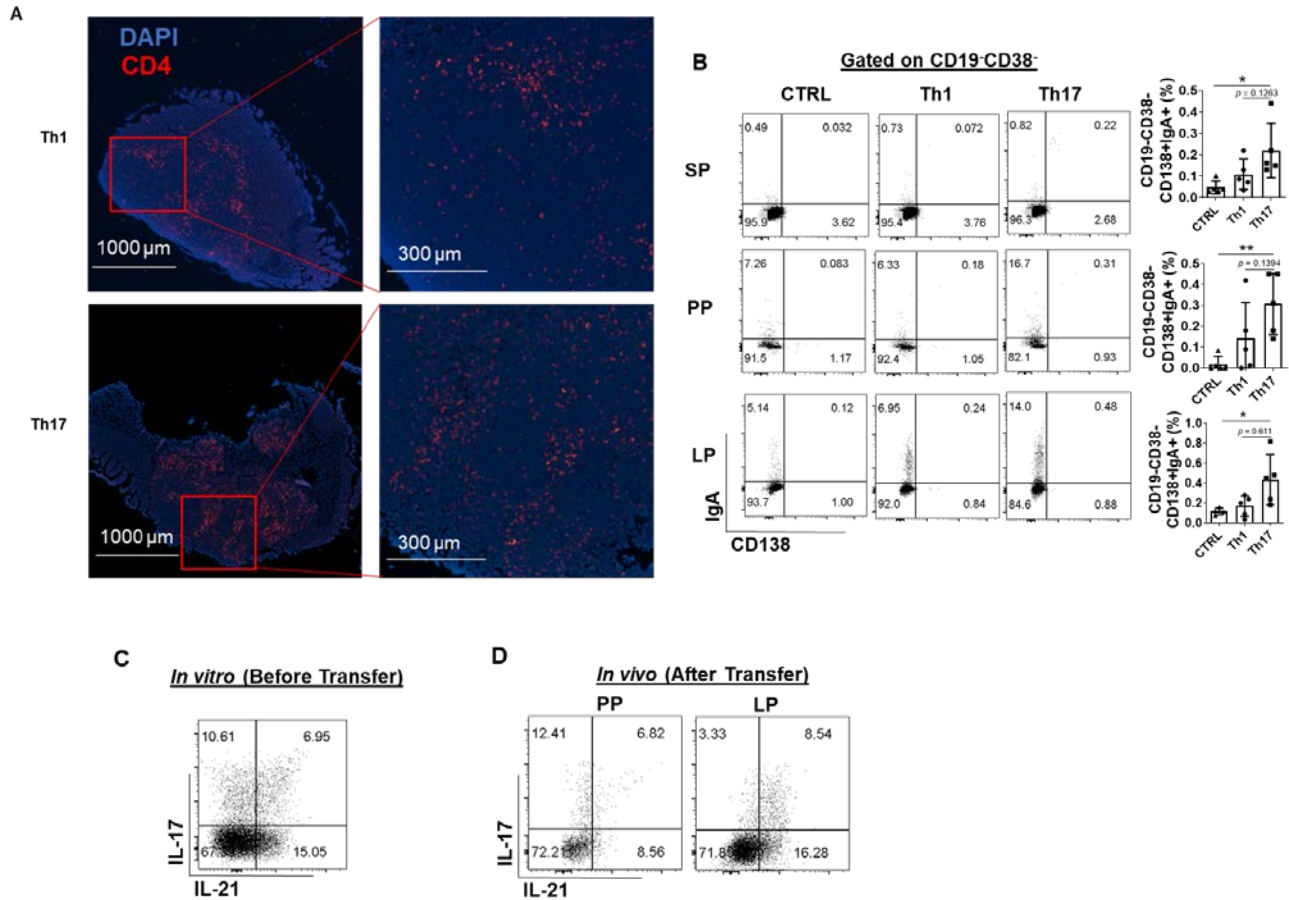

**Supplementary Figure 1. Transfer of microbiota specific Th17 cells promotes IgA<sup>+</sup> plasma cells in TCRβ/δ<sup>-/-</sup> mice.** Splenic CBir1 Tg Th1 ( $1 \times 10^6$ ) or Th17 ( $1 \times 10^6$ ) cells were transferred to TCRβ/δ<sup>-/-</sup> mice (n = 5/group) i.v.. (A) PPs were stained with DAPI and anti-CD4 from TCRβ/δ<sup>-/-</sup> mice received Th1 or Th17 cells. (B) Mice were sacrificed on day 21, and the CD19<sup>-</sup>CD38<sup>-</sup>CD138<sup>+</sup>IgA<sup>+</sup> B cells in spleens (SP), PP, and LP were analyzed by FACS. (C) IL-17 and IL-21 expression in *in vitro* generated-CBir1 Tg Th17 cell by FACS. (D) T cell expression of IL-17 and IL-21 in PP and LP from TCRβ/δ<sup>-/-</sup> mice 3 weeks post Th17 cell transfer. One representative of 2-3 experiments with similar results was shown. \* $p < 0.05$ . One-way ANOVA.

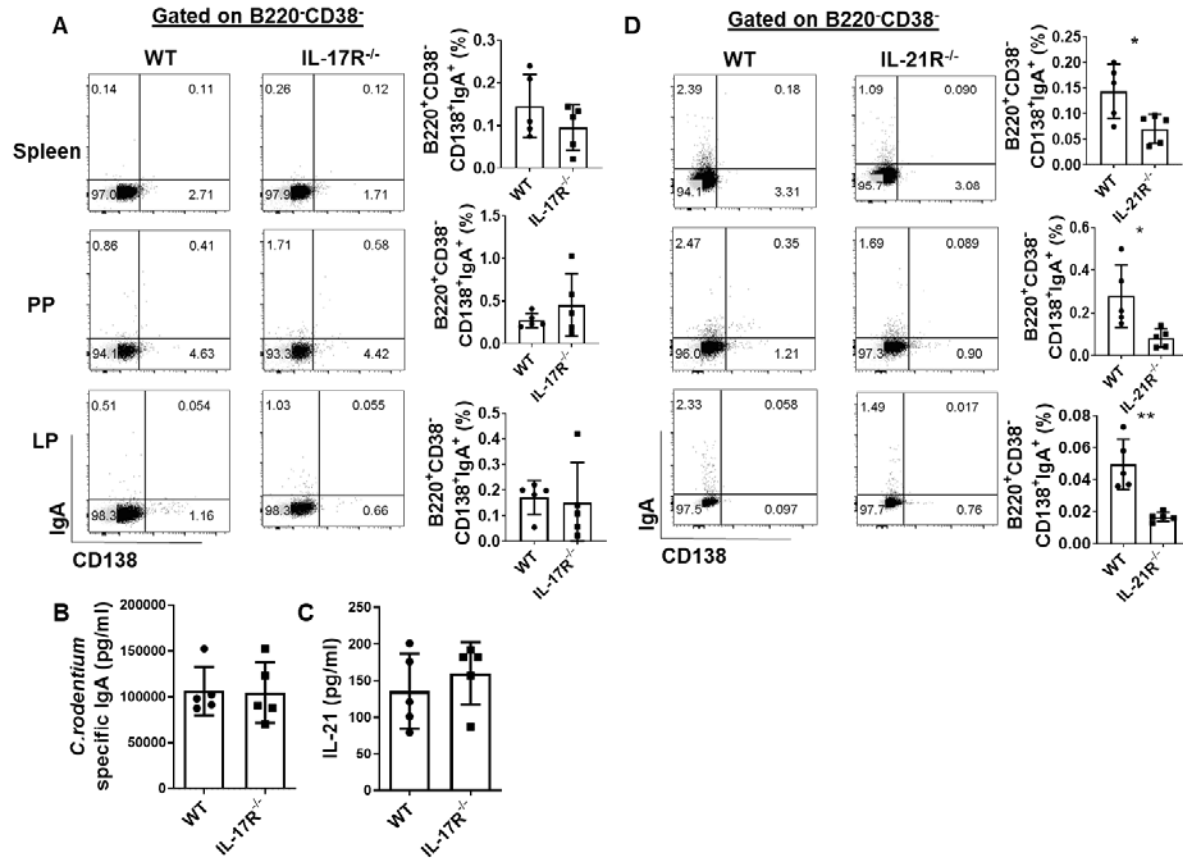

**Supplementary Figure 2. IgA plasma B cells development is impaired in IL-21R<sup>-/-</sup> mice while is intact in IL-17R<sup>-/-</sup> mice.** WT, IL-17R<sup>-/-</sup>, IL-21R<sup>-/-</sup> mice (n = 5/group) were orally infected with *Citrobacter rodentium* (2 × 10<sup>6</sup> CFU/mouse) on day 0, and re-infected with the same amount of *C. rodentium* on day 35 after initial infection. One week after the *C. rodentium* re-infection, mice were sacrificed, and the B220<sup>+</sup>CD38<sup>-</sup>CD138<sup>+</sup>IgA<sup>+</sup> B cells in SP, PP, and LP from WT and IL-17R<sup>-/-</sup> mice (A) or IL-21R<sup>-/-</sup> mice (D) were analyzed by FACS. (B-C) Sera were collected from WT and IL-17R<sup>-/-</sup> mice when sacrificed, and *C. rodentium*-specific IgA and IL-21 levels in sera were measured by ELISA. One representative of 2-3 experiments with similar results was shown. \**p* < 0.05. Unpaired Student's t test.

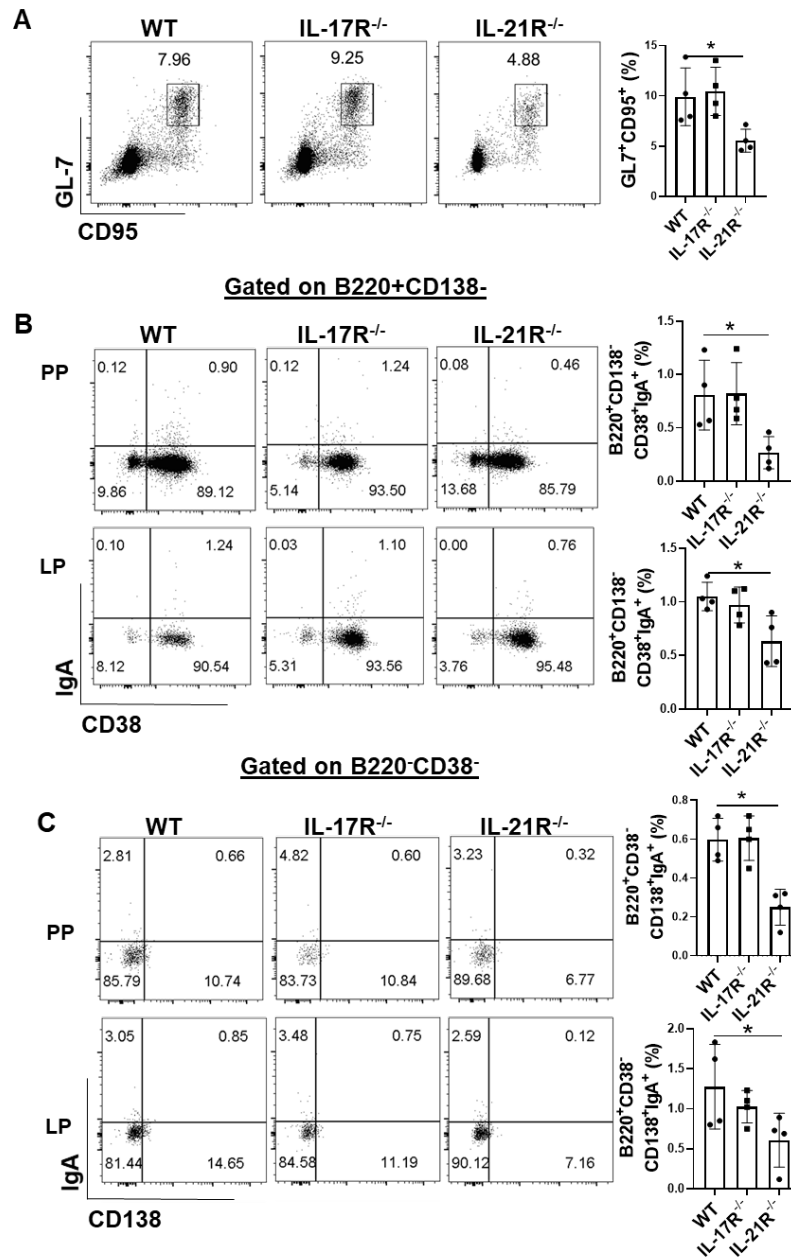

**Supplementary Figure 3. IL-21R<sup>-/-</sup>, but not IL-17<sup>-/-</sup>, mice showed impaired memory and plasma IgA cells under steady condition.** GL-7<sup>+</sup> CD95<sup>+</sup> B cells in PP (A), B220<sup>+</sup> CD138<sup>-</sup>CD38<sup>+</sup>IgA<sup>+</sup>B cells (B), and B220<sup>-</sup>CD38<sup>-</sup>CD138<sup>+</sup> IgA<sup>+</sup> B cells (C) in PP and LP from WT, IL-17R<sup>-/-</sup>, and IL-21R<sup>-/-</sup> mice were analyzed by FACS. One representative of 2-3 experiments with similar results was shown. \**p* < 0.05. One-way ANOVA.

**Gated on B220<sup>-</sup>CD38<sup>-</sup>**

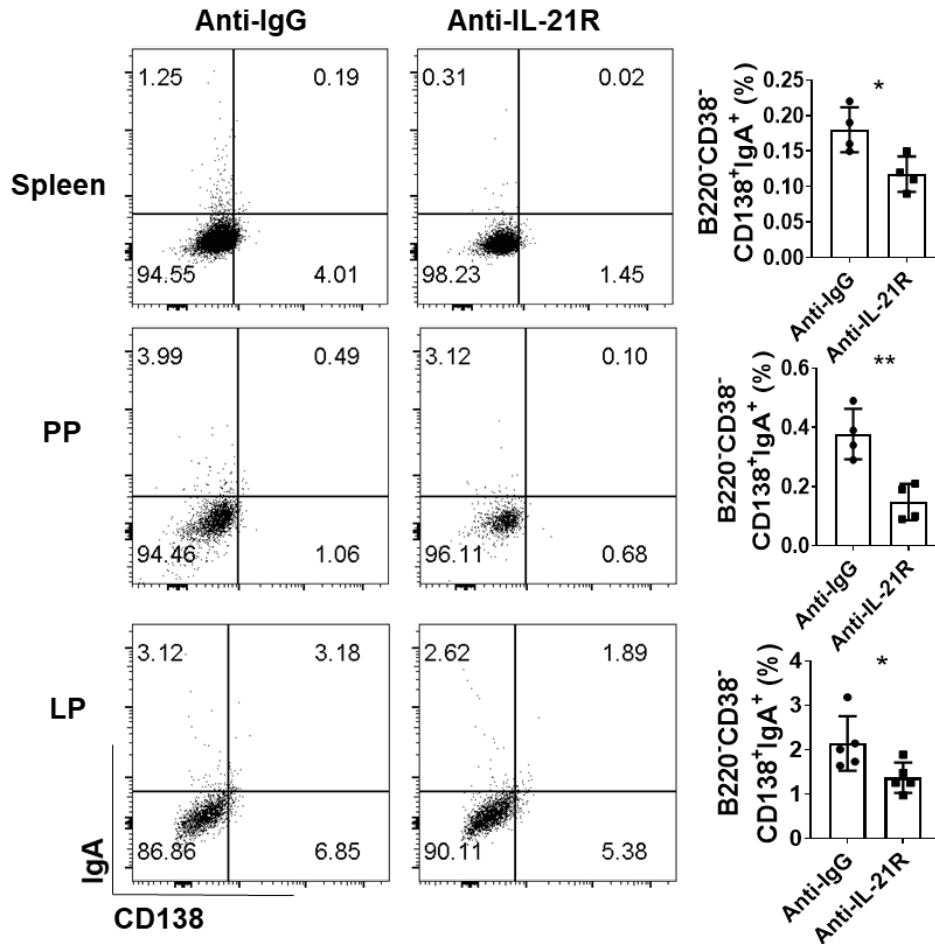

**Supplementary Figure 4. Anti-IL-21R antibody suppressed plasma IgA cells.** WT mice were orally infected with *Citrobacter rodentium* ( $2 \times 10^6$  CFU/mouse) on day 0, and re-infected with the same amount of *C. rodentium* on day 35 after initial infection. One group of mice (n = 5) were administrated with anti-IL-21R antibody (25mg/kg) i.p every the other day from day 35, and another group of mice (n = 5) were given anti-IgG antibody as control. Mice were sacrificed one week post re-infection, and B220<sup>+</sup>CD38<sup>-</sup>CD138<sup>+</sup>IgA<sup>+</sup> B cells in SP, PP, and LPL were analyzed by FACS. One representative of two experiments with similar results. \*p < 0.05, \*\*p < 0.01. Unpaired Student's t test.
